# Supplementary material
Source: PubMed Central journal article supplement (PMC2781599)

# Supplemental Fig.1

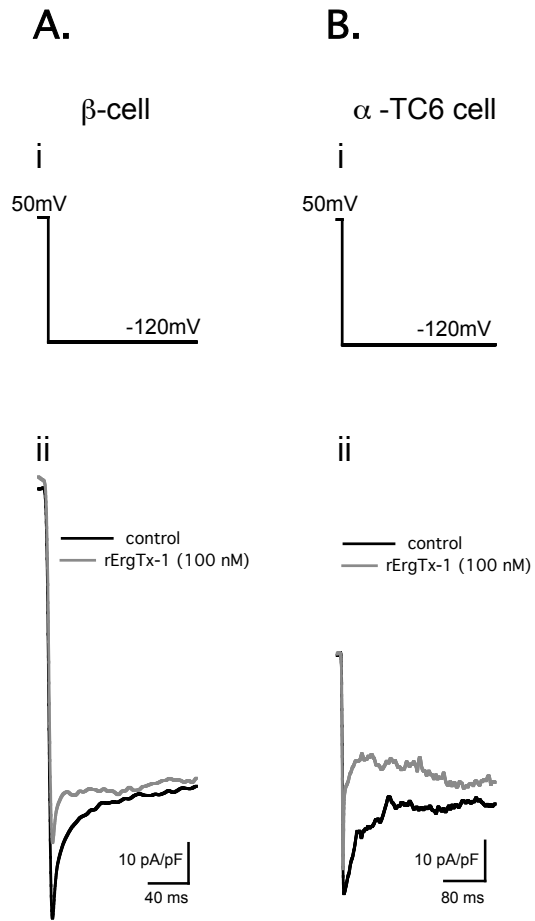

Supplement: supp_M109.040659_jbc.M109.040659-1.pdf [file supp_M109.040659_jbc.M109.040659-1.pdf]
